# Supplementary material for: pYR4 From a Norwegian Isolate of Yersinia ruckeri Is a Putative Virulence Plasmid Encoding Both a Type IV Pilus and a Type IV Secretion System
Source: PubMed Central journal article supplement (PMC6232867; doi:10.3389/fcimb.2018.00373), 2018-10-30
Supplement: Data_Sheet_1.pdf [file Data_Sheet_1.pdf]

## Supplementary Material

### pYR4 from a Norwegian isolate of *Yersinia ruckeri* is a putative virulence plasmid encoding a type IV pilus

Agnieszka Wrobel\*, Claudio Ottoni, Jack C. Leo, Dirk Linke

\*Correspondence: Dirk Linke: [dirk.linke@ibv.uio.no](mailto:dirk.linke@ibv.uio.no)

#### Supplementary figure 1.

Putative promoters prediction for pYR4 operons using bTSSfinder (1) (Shahmuradov *et al.*, 2017) and BPROM (2) (Solovyev and Salamov, 2011) using default parameters. Raw data is included. bTSSfinder predicts putative promoters for five classes of  $\sigma$  factors in Cyanobacteria ( $\sigma^A$ ,  $\sigma^C$ ,  $\sigma^H$ ,  $\sigma^G$  and  $\sigma^F$ ) and for five classes of sigma factors in *E. coli* ( $\sigma^{70}$ ,  $\sigma^{38}$ ,  $\sigma^{32}$ ,  $\sigma^{28}$  and  $\sigma^{24}$ ) while BPROM predicts putative promoters for one class of  $\sigma$  factors, namely  $\sigma^{70}$ .

#### 1) Putative promoters prediction using bTSSfinder (Shahmuradov *et al.*, 2017)

a) Putative promoter prediction upstream from hypothetical protein (*pil* operon)

Input sequence:

```
CTTGTCTTCGAACCTAGTTTGCTGGGGTTCTAATTACACTCCCGGCATTTAGCAGTTAACCCGGCCTTGTGTC
GGGCTCTTTCCCCCAGATGCGTTACTACAACACTGGATGCCGGCAATGGTGTCTGAGCTGGTCCTGCCATG
GACATCCCTATCCCTTTACCGGCTGGTCATTTATGGCGTATTCTTCTGTTGGAGGGTGATACAGACACCAT
TGCCGGCATTTCGATACACCAACTCAATTAAGGAGATAGCCT
```

Search for sigma 70, 24, 32, 28 and 38 promoters

Input sequence file with query sequence(s): /var/www/btssfinder/cgi-bin/userdata/928.fasta

Search parameters: for *E. coli*

TSSs of different Sigma classes are processed separately

Search only on Positive Strand

Total scoring threshold for

```
sigma70: 0.06
sigma24: 0.00
sigma32: 1.01
sigma28: 1.24
sigma38: 0.31
```

Length of Query sequence: 260

sigma24(+): 202 Score 1.77 -35 (172) tcattt >>> totgt -10 (195)

sigma38(+): 201 Score 1.52 -35 (160) ttacc >>> tattcc -10 (189)

Total: 2 promoter(s) predicted

b) No putative promoters were found upstream from *pilL*

Input sequence:

```
CTCCTCTCGTCACCCTAGCAATATCGTCCCCATATACATCAATCGATATGGCTATTCCATTACCTGATGAAA
CCTAT
```

c) Putative promoter prediction upstream from *traN*

Input sequence:

```
TCAATCATCACCCGCGATGCCCGCTAATTTTACTCAGGTACTCTCATGAAAAATCTCACTCTCACTGCAGTG
GTTATGCTGCTGTCAGCAGTCCCGGCACTCGCGACAGATTGGGTACCAGCCCGCACGGGTAATACACCAAC
```

CACCGAGATCCCAGCGGCACCGAAACCTACAGCACCTCAAAACGAACCTGTAGTCCCTCAAACAGATATCA  
 CTGCCCTGATGCTCCAGACACCACCGCCACCCCCCCTACTGCAGCCCAAGCATGGGCGATGAGCCAGGCC  
 AACCTCTGGATAATCGCCAGGGTGTGAAATGGTAGGCAAAGTGATG

Search for sigma 70, 24, 32, 28 and 38 promoters

Input sequence file with query sequence(s): /var/www/btssfinder/cgi-bin/userdata/812.fasta

Search parameters: for *E. coli*

TSSs of different Sigma classes are processed separately

Search on Positive Strand

Total scoring threshold for

sigma70: 0.06  
 sigma24: 0.00  
 sigma32: 1.01  
 sigma28: 1.24  
 sigma38: 0.31

Length of Query sequence: 333

sigma24(+): 282 Score 0.30 -35 (251) ccactg >>> gcgat -10 (275)

sigma32(+): 261 Score 1.91 -35 (226) ctccaga >>> cccccactg -10 (256)

Total: 2 promoter(s) predicted

d) No putative promoters were found upstream of *trbA*

Input sequence:

ACGTATCGCCGACGAGCAGGGGCTTAACCTGATCCTGCCGCCAACTAATTCCCCTTCTGCAGTAACCCAC  
 AGTACCGACTCTGGGGCACCCTTTTTCAGGGTGCCTCTTCTTTTGCATTTCGCAAATATTTATAGGTCTCCTCT  
 ATGGCGCAACCCATTCGCAAT

e) No putative promoters were found upstream of *ena*

Input sequence:

GATGATTTTGATAACACAACCGAACATCTTACCTACTGAAATAAATACTTCCCCGCCAGCTCCTCCAACCGT  
 TGACTAAACCATTAGCTCAATAAGCTCAATTTTTTAATCATTAAGGAATGAAAATGACTATCCGTACATTAC  
 GGTCAATTACTTTGGCCGGCGTTCTAC

f) Putative promoter prediction upstream of *mobC*

Input sequence:

TGGCGTTTTTCACTCTTGCTCATCTTCAATCCTGCTTAACCGCTGAGGCGGACACTGCAAGTAGGGTGTCCG  
 GACGGAGTCTGACCAGGTCGTTTTGTGGGACCGACTGCGTGCAGGCGGTGCTACAAAACATACCCTGTCC  
 CACGTTTTACTTCAGTATTCGCTATTATGGCCGATTTTCTTTATAAAGTCATTACGCCAGATGTGGAATGGG  
 GTACCTTTGATTCATGAGTGAATACAAGGGTATAATTGGAAAGTTAACTCTGCACAAAGCACAGAAGGATA  
 TGAGGATGGCCGCAAACAGT

Search for sigma 70, 24, 32, 28 and 38 promoters

Input sequence file with query sequence(s): /var/www/btssfinder/cgi-bin/userdata/820.fasta

Search parameters: for *E. coli*

TSSs of different Sigma classes are processed separately

Search on Positive Strand

Total scoring threshold for

sigma70: 0.06  
 sigma24: 0.00  
 sigma32: 1.01  
 sigma28: 1.24  
 sigma38: 0.31

Length of Query sequence: 306

sigma70(+): 256 Score 1.91 -35 (222) ttgatt >>> tataat -10 (251)

sigma38(+): 255 Score 1.80 -35 (222) ttgatt >>> tataat -10 (251)

sigma32(+): 210 Score 1.86 -35 (175) cgatttt >>> tacgccagat -10 (205)

Total: 3 promoter(s) predicted

g) Putative promoter prediction upstream of *stbA*

Input sequence:

```
CAAAATACATTCATCATTTTTGAACCTCATCAATACTCAAACCTGAGTGGTTGAAGTGCACCCAAGAAATGCA
GCTCACAATTTAGGCGATTCCCATAATCTATGTCCGGTCAGTTACTCAAATTGGGGTGTAAATCATATTAAT
ATCATTACGCAATCAAATCAACCTAAAATGATATTGTTTTAATATTTAAACAATATTAATAAATCAATATT
CAACCCGTGAGATAAAAGAGAAGGTGCGTACACAGTAATGATTGACAATCAATAGTTAATCACTATTATCT
TAATATTATTTAATATTTAAAGGACTAACTATGATACTTACAGTTGGTAATACAA
```

Search for sigma 70, 24, 32, 28 and 38 promoters

Input sequence file with query sequence(s): /var/www/btssfinder/cgi-bin/userdata/826.fasta

Search parameters: for *E. coli*

TSSs of different Sigma classes are processed separately

Search on Positive Strand

Total scoring threshold for

```
sigma70: 0.06
sigma24: 0.00
sigma32: 1.01
sigma28: 1.24
sigma38: 0.31
```

Length of Query sequence: 342

```
sigma32(+): 288 Score 1.95 -35 (254) tgattga >>> atcactatta -10 (283)
sigma38(+): 257 Score 1.94 -35 (221) cgtgag >>> tacaca -10 (249)
sigma28(+): 237 Score 1.97 -35 (204) aaaatcaa >>> tgagataa -10 (230)
sigma70(+): 221 Score 1.97 -35 (182) tttaat >>> caatat -10 (214)
sigma24(+): 219 Score 1.97 -35 (184) taatat >>> tcaat -10 (212)
```

Total: 5 promoter(s) predicted

h) Putative promoter prediction upstream of *parA*

Input sequence:

```
CAAAATACATTCATCATTTTTGAACCTCATCAATACTCAAACCTGAGTGGTTGAAGTGCACCCAAGAAATGCA
GCTCACAATTTAGGCGATTCCCATAATCTATGTCCGGTCAGTTACTCAAATTGGGGTGTAAATCATATTAAT
ATCATTACGCAATCAAATCAACCTAAAATGATATTGTTTTAATATTTAAACAATATTAATAAATCAATATT
CAACCCGTGAGATAAAAGAGAAGGTGCGTACACAGTAATGATTGACAATCAATAGTTAATCACTATTATCT
TAATATTATTTAATATTTAAAGGACTAACTATGATACTTACAGTTGGTAATACAA
```

Search for sigma 70, 24, 32, 28 and 38 promoters

Input sequence file with query sequence(s): /var/www/btssfinder/cgi-bin/userdata/823.fasta

Search parameters: for *E. coli*

TSSs of different Sigma classes are processed separately

Search on Positive Strand

Total scoring threshold for

```
sigma70: 0.06
sigma24: 0.00
sigma32: 1.01
sigma28: 1.24
sigma38: 0.31
```

Length of Query sequence: 342

```
sigma32(+): 288 Score 1.95 -35 (254) tgattga >>> atcactatta -10 (283)
sigma38(+): 257 Score 1.94 -35 (221) cgtgag >>> tacaca -10 (249)
sigma28(+): 237 Score 1.97 -35 (204) aaaatcaa >>> tgagataa -10 (230)
sigma70(+): 221 Score 1.97 -35 (182) tttaat >>> caatat -10 (214)
sigma24(+): 219 Score 1.97 -35 (184) taatat >>> tcaat -10 (212)
```

Total: 5 promoter(s) predicted

## 2) Putative promoters prediction using BPROM (Solovyev and Salamov, 2011)

a) Putative promoter prediction upstream from hypothetical protein (*pil* operon)

Input sequence:

CTTGTCTTCGAACCTAGTTTGCTGGGGTTCTAATTACACTCCCGGCATTTAGCAGTTAACCCGGCCTTGTGTC  
GGGCTCTTTTCCCCAGATGCGTTACTACAACACTGGATGCCGGCAATGGTGTCTGAGCTGGTCCTGCCATG  
GACATCCCTATCCCTTTACCGGCTGGTCATTTATGGCGTATTCTTCTGTTGGAGGGTGATACAGACACCAT  
TGCCGGCATTTCGATACACCAACTCAATTAAGGAGATAGCCT

Length of sequence- 260

Threshold for promoters - 0.20

Number of predicted promoters - 1

Promoter Pos: 196 LDF- 1.43

-10 box at pos. 181 GCGTATTC Score 15

-35 box at pos. 16 TTACCG Score 32

Oligonucleotides from known TF binding sites:

For promoter at 196:

rpoS17: GGAGGGTG at position 197 Score - 12

b) No putative promoters were found upstream from *pilL*

Input sequence:

CTCCTCTCGTCACCCTAGCAATATCGTCCCCATATACATCAATCGATATGGCTATTCCATTACCTGATGAAA  
CCTAT

c) Putative promoter prediction upstream from *traN*

Input sequence:

TCAATCATCACCCGCGATGCCCGCTAATTTTACTCAGGTACTCTCATGAAAAATCTCACTCTCACTGCAGTG  
GTTATGCTGCTGTCAGCAGTCCCAGGACTCGCGACAGATTGGGTACCAGCCCGCACGGGTAATACACCAAC  
CACCGAGATCCCAGCGGCACCGAAACCTACAGCACCTCAAACGAACCTGTAGTCCCTCAAACAGATATCA  
CTGCCCTGATGCTCCAGACACCACCGCCACCCCCCCTGAGCCCAAGCATGGGCGATGAGCCAGGCC  
AACCTCTGGATAATCGCCAGGGTGTTGAAATGGTAGGCAAAGTGATG

Length of sequence- 333

Threshold for promoters - 0.20

Number of predicted promoters - 1

Promoter Pos: 61 LDF- 1.52

-10 box at pos. 46 ATGAAAAAT Score 39

-35 box at pos. 29 TTTACT Score 42

Oligonucleotides from known TF binding sites:

No such sites for promoter at 61

d) Putative promoter predicted upstream of *trbA*

Input sequence:

ACGTATCGCCGACGAGCAGGGGCTTAACCTGATCCTGCCGCCAAACTAATCCCCTTCTGCAGTAACCCAC  
AGTACCGACTCTGGGGCACCCCTTTTCAGGGTGCCTCTTCTTTGCATTGCAAAATATTTATAGGTCTCCTCT  
ATGGCGCAACCCATTCGCAAT

Length of sequence- 165

Threshold for promoters - 0.20

Number of predicted promoters - 1

Promoter Pos: 134 LDF- 1.65

-10 box at pos. 119 TCGCAAAAT Score 47

-35 box at pos. 94 TTTCAG Score 30

Oligonucleotides from known TF binding sites:

No such sites for promoter at 134

e) Predicted putative promoters were found downstream of *trbC*

Input sequence:

AACACAACCGAACATCTTACCTACTGAAATAAAATACTTCCCCGCCAGCTCCTCCAACCGTTGACTAAACCA  
TTAGCTCAATAAGCTCAATTTTTTAATCATTAAAGGAATGAAAATGACTATCCGTACATTACGGTCAATTACT  
TTGGCCGGCGTTCTACTTTTGGCTGTCAGTTCTGCCGTTGCAGCCCCGACG

Length of sequence- 194

Threshold for promoters - 0.20

Number of predicted promoters - 1

Promoter Pos: 93 LDF- 2.55

-10 box at pos. 78 CAATAAGCT Score 31

-35 box at pos. 60 TTGACT Score 61

Oligonucleotides from known TF binding sites:

For promoter at 93:

rpoD17: CTAAACCA at position 64 Score - 6

f) Putative promoter prediction upstream of *mobC*

Input sequence:

TGGCGTTTTTCACTCTTGCTCATCTTCAATCCTGCTTAACCGCTGAGGCGGACACTGCAAGTAGGGTGTCCG  
GACGGAGTCCTGACCAGGTCGTTTTGTGGGACCGACTGCGTGCAGGCGGTGCTACAAAACATACCCTGTCC  
CACGTTTTACTTCAGTATTCGCTATTATGGCCGATTTTCTTTATAAAGTCATTACGCCAGATGTGGAATGGG  
GTACCTTTGATTCATGAGTGAATACAAGGGTATAATTGAAAGTTAACTCTGCACAAAGCACAGAAGGATA  
TGAGGATGGCCGCAAACAGT

Length of sequence- 306

Threshold for promoters - 0.20

Number of predicted promoters - 1

Promoter Pos: 258 LDF- 5.32

-10 box at pos. 243 GGGTATAAT Score 91

-35 box at pos. 222 TTGATT Score 53

Oligonucleotides from known TF binding sites:

No such sites for promoter at 258

g) Putative promoter prediction downstream of *stbB*

Input sequence:

AGAATTATTTGAGTAAGTTTGTGCATGAGAGTTACTCCAGTTATTCGCGGCACCATTGCCGTGCCGCCACGA  
CAGTCCTGCGGATAGTGAGAAAAACAAGGGCAGCGCCGCAAGCCGCAGCGCAGGCGTAAACGGGCTGAAT  
GCCCTGTTTACGGTGAGAACGGGTGAGGACGTTGGCGTCAGCGTTCCCTTGTGTTGTGAAACGGCAGGGCT  
ACAGTGAAGGCACGGCAAAGGGGATATTCATACGTGAATAAATAGAAGTCAAGTTATCACCTAAAATTGT  
AGATGACTTTTCACTCCCCTTCCCTACCGGATTTTGGCATGAGCTGTCAGGGCTAACGTATTGAGTAAGCA  
GCAAACACATTACATGAAGCCCCGACATTTTCTT

Length of sequence- 388

Threshold for promoters - 0.20

Number of predicted promoters - 1

Promoter Pos: 287 LDF- 5.40

-10 box at pos. 272 ACCTAAAAT Score 62

-35 box at pos. 248 GTGAAT Score 22

Oligonucleotides from known TF binding sites:

For promoter at 287:

argR: ATATTCAT at position 238 Score - 7

rpoD17: AATAAATA at position 251 Score - 11

cytR: ATAGAAGT at position 256 Score - 7

rpoD19: CACCTAAA at position 271 Score - 6

rpoN: AAATTGTA at position 277 Score - 8

h) Putative promoter prediction upstream of *stbA*

Input sequence:

CAAAATACATTCATCATTGTTGAACCTCATCAATACTCAAACCTGAGTGGTTGAAGTGCACCCAAGAAATGCA  
 GCTCACAATTTAGGCGATTCCCATAATCTATGTCCGGTCAGTTACTCAAATTGGGGTGTAAATCATATTAAT  
 ATCATTACGCAATCAAATCAACCTAAAATGATATTGTTTTAATATTTAAAACAATATTAATAAATCAATATT  
 CAACCCGTGAGATAAAAGAGAAGGTGCGTACACAGTAATGATTGACAATCAATAGTTAATCACTATTATCT  
 TAATATTATTTAATATTTAAAAGGACTAACTATGATACTTACAGTTGGTAATACAA

Length of sequence- 342

Threshold for promoters - 0.20

Number of predicted promoters - 1

Promoter Pos: 292 LDF- 5.33

-10 box at pos. 276 CACTATTAT Score 56

-35 box at pos. 257 TTGACA Score 66

Oligonucleotides from known TF binding sites:

For promoter at 292:

lrp: TTGACAAT at position 257 Score - 7

rpoD17: AATAGTTA at position 266 Score - 13

i) Putative promoter prediction upstream of *parA*

Input sequence:

CAAAATACATTCATCATTGTTGAACCTCATCAATACTCAAACCTGAGTGGTTGAAGTGCACCCAAGAAATGCA  
 GCTCACAATTTAGGCGATTCCCATAATCTATGTCCGGTCAGTTACTCAAATTGGGGTGTAAATCATATTAAT  
 ATCATTACGCAATCAAATCAACCTAAAATGATATTGTTTTAATATTTAAAACAATATTAATAAATCAATATT  
 CAACCCGTGAGATAAAAGAGAAGGTGCGTACACAGTAATGATTGACAATCAATAGTTAATCACTATTATCT  
 TAATATTATTTAATATTTAAAAGGACTAACTATGATACTTACAGTTGGTAATACAA

Length of sequence- 342

Threshold for promoters - 0.20

Number of predicted promoters - 1

Promoter Pos: 292 LDF- 5.33

-10 box at pos. 276 CACTATTAT Score 56

-35 box at pos. 257 TTGACA Score 66

Oligonucleotides from known TF binding sites:

For promoter at 292:

lrp: TTGACAAT at position 257 Score - 7

rpoD17: AATAGTTA at position 266 Score - 13

## Supplementary figure 2.

Molecular Phylogenetic analysis of pYR4 RepA protein to its closest homologs from different species within IncFII and IncA/C plasmid family. The tree shows two different clusters which resemble two different plasmid groups including IncFII (depicted in green) and IncA/C plasmid family (depicted in red). Note that the pYR4 RepA falls into the same cluster as other RepA *Yersinia* protein sequences from the same plasmid family. The tree with the highest log likelihood (-5236.58) is shown. The percentage of trees in which the associated taxa clustered together is shown next to the branches. Initial tree(s) for the heuristic search were obtained automatically by applying Neighbor-Join and BioNJ algorithms to a matrix of pairwise distances estimated using a JTT model, and then selecting the topology with superior log likelihood value. The tree is drawn to scale, with branch lengths measured in the number of substitutions per site. The analysis involved 40 amino acid sequences. All positions containing gaps and missing data were eliminated. There were a total of 210 positions in the final dataset. Evolutionary analyses were conducted in MEGA X.

## Inca/C plasmid family

RepA\_E.coli\_ACQ77966.1  
 RepA\_E.coli\_ACQ77613.1  
 RepA\_E.coli\_AEN71339.1  
 64 RepA\_E.coli\_AEP32461.1  
 RepA\_K.pneumoniae\_AEU09767.1  
 100 RepA\_K.pneumoniae\_AFC34608.1  
 RepA\_S.enterica\_ACQ77786.1  
 RepA\_S.enterica subsp. enterica serovarHeidelberg\_ACQ77966.1  
**RepA\_Y.ruckeri\_pYR1**

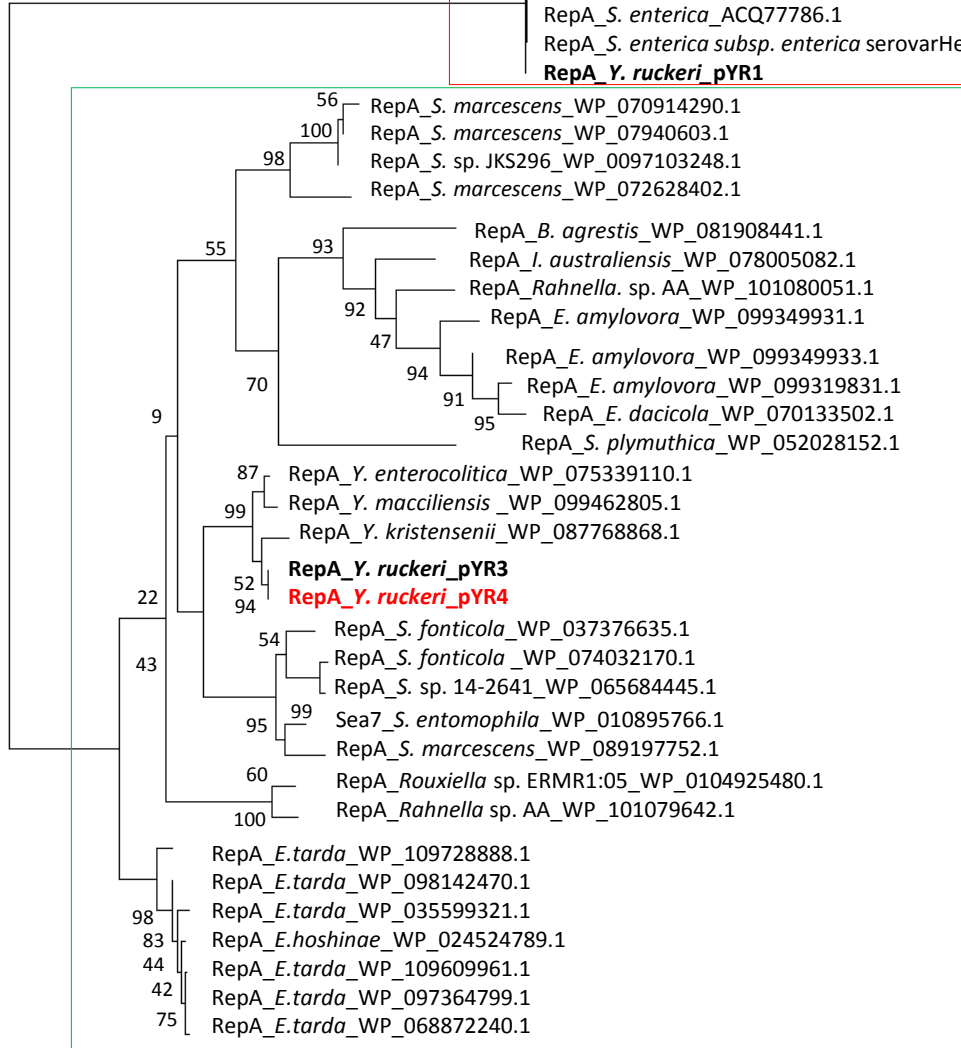

## IncFII plasmid family

————  
 0.20

### Supplementary figure 3.

pYR4 plasmid annotations obtained by employing RAST (Rapid Annotation using Subsystem Technology)(Aziz *et al.*, 2008) and HHPred available at the Max Planck Institute for Developmental Biology Toolkit (Söding *et al.*, 2005)

### Supplementary figure 4.

*Y. ruckeri* plasmids annotations obtained using RAST (Rapid Annotation using Subsystem Technology)(Aziz *et al.*, 2008).The file contains 6 different *Y. ruckeri* plasmid sequences (nucleotide and protein) including pYR1, pYR2, pYR3, pYR4, pLT, pWKY together with their proposed functions.

### Supplementary figure 5.

Gen Bank Accession numbers for genome sequences (plasmid/chromosome) used in the study.

| Species                                                          | Genomic information | GenBank       |
|------------------------------------------------------------------|---------------------|---------------|
| <i>E. amylovora</i>                                              | pEL60               | AY422214      |
|                                                                  | pEA68               | HG813238      |
|                                                                  | pEA72               | NC_013973     |
|                                                                  | pEA78               | NC_023072     |
| <i>S. entomophila</i>                                            | pADAP               | AF135182      |
| <i>C. freundii</i>                                               | pCTX-M3             | AF550415      |
| <i>S. enterica</i> subsp. <i>enterica</i><br>serovar Typhimurium | R64                 | NC_005014.1   |
| <i>Y. ruckeri</i> CSF007-82                                      | Chromosome          | LN681231      |
| <i>Y. ruckeri</i> Big Creek 74                                   | Chromosome          | NZ_CP011078.1 |
| <i>Y. ruckeri</i> QMA0440                                        | Chromosome          | CP017236.1    |



## Supplementary Material

|                                    |            |                          |
|------------------------------------|------------|--------------------------|
| <i>Y. ruckeri</i> SC09             | Chromosome | CP025800.1               |
| <i>Y. ruckeri</i> ATCC29473        | Chromosome | KN150747.1<br>KN150748.1 |
| <i>Y. ruckeri</i> YRB              | Chromosome | CP009539.1               |
| <i>Y. ruckeri</i> 150              | Chromosome | GCF_001750505.1          |
| <i>Y. pestis</i> CO92              | Chromosome | AL590842                 |
| <i>Y. pseudotuberculosis</i> YPIII | Chromosome | CP000950.1               |
| <i>Y. enterocolitica</i> 8081      | Chromosome | NC_008800.1              |

**Supplementary figure 6.**

Circular representation of comparative analysis as in Figure 2 showing ribbon links of ATCC29473 with the two plasmids, pYR3 and pYR4.







**Supplementary figure 7.**

Circular representation of comparative analysis as in Figure 2 showing ribbon links of 150 with the two plasmids, pYR3 and pYR4.
